# Supplementary material for: A prediction model for risk factors of testicular atrophy after orchiopexy in children with undescended testis
Source: PubMed Central journal article supplement — Transl Pediatr. 2021 Apr;10(4):882–92. doi: 10.21037/tp-20-473 (PMC8107851; doi:10.21037/tp-20-473), 2021-04
Supplement: tp-10-04-882-dss.pdf [file tp-10-04-882-dss.pdf]

## Data Sharing Statement

|                     |                                                                                                                                                     |                                                                                                                  |
|---------------------|-----------------------------------------------------------------------------------------------------------------------------------------------------|------------------------------------------------------------------------------------------------------------------|
| <b>Article Info</b> | <a href="http://dx.doi.org/10.21037/tp-20-473">http://dx.doi.org/10.21037/tp-20-473</a>                                                             |                                                                                                                  |
| <b>Item</b>         | <b>Question</b>                                                                                                                                     | <b>Authors' Response<br/>(place “-” if not applicable)</b>                                                       |
| 1                   | Would you like to share data collected for your study to others?                                                                                    | Yes                                                                                                              |
| 2                   | If not, would you like to share the reason for your decision?                                                                                       | -                                                                                                                |
| 3                   | What data in particular will be shared?                                                                                                             | The testicular atrophy data in particular will be shared.                                                        |
| 4                   | Any other documents will be shared? Such as study protocol, statistical analysis plan, informed consent form, clinical study report, analytic code. | Statistical analysis plan will also be shared.                                                                   |
| 5                   | When will data availability begin?                                                                                                                  | From January 1 <sup>st</sup> , 2023. Because we will further analyze these data in the next two years.           |
| 6                   | When will data availability end?                                                                                                                    | January 1 <sup>st</sup> , 2025, since some data may be updated over time.                                        |
| 7                   | To whom will you share the data?                                                                                                                    | Pediatricians, pediatric surgeons and urologists.                                                                |
| 8                   | For what type of analysis or purpose?                                                                                                               | To analyze the efficacy of prediction model for testicular atrophy                                               |
| 9                   | How or where can the data/ documents be obtained?                                                                                                   | Emails could be sent to the address below to obtain the shared data:<br>Yangzhilin207@163.com                    |
| 10                  | Any other restrictions?                                                                                                                             | We may balance the potential benefits and risks for each request and then provide the data that could be shared. |
